# Supplementary material
Source: Springer Nature journal article supplement (https://www.springermedizin.de/resource/supplementary/12911_2013_791_MOESM1_ESM.pdf/9526660)

Number of admissions

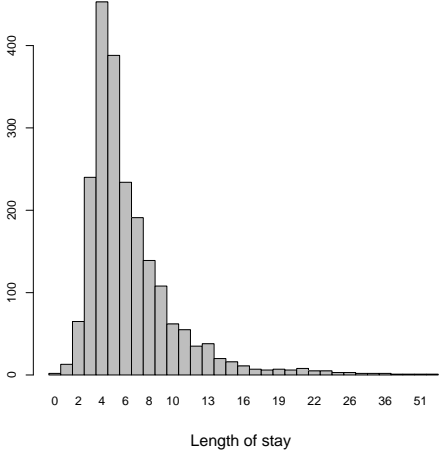

Supplement: MOESM1 [file 9526660]
